# Supplementary material
Source: PubMed Central journal article supplement (PMC3763747)
Supplement: NIHMS509482-supplement-02.pdf [file NIHMS509482-supplement-02.pdf]

**Table1A. Overview of Database**

| <b>Criteria</b>                 | <b>N (%)</b>     |
|---------------------------------|------------------|
| <b>Total number of patients</b> | <b>58 (100)</b>  |
| <b>Age &lt;3 years</b>          | <b>12 (20.6)</b> |
| <b>≥ 3 years</b>                | <b>46 (79.4)</b> |
| <b>Resection: GTR</b>           | <b>37 (63.8)</b> |
| <b>Non-GTR</b>                  | <b>21 (36.2)</b> |
| <b>Metastases: No</b>           | <b>41 (70.4)</b> |
| <b>Yes</b>                      | <b>17 (29.3)</b> |
| <b>Histology: Classic</b>       | <b>36 (62.1)</b> |
| <b>Anaplastic</b>               | <b>15 (25.9)</b> |
| <b>Desmoplastic</b>             | <b>7 (12.0)</b>  |

**Table 1B. Event Free Survival (EFS)**

| EFS                             | N  | Number of events | 3 year | 95% CI for  |       | 5 year | 95% CI for  |       | Log-rank p-value |
|---------------------------------|----|------------------|--------|-------------|-------|--------|-------------|-------|------------------|
|                                 |    |                  | Rate   | 3-year Rate |       | Rate   | 5-year Rate |       |                  |
| <b>Total number of patients</b> | 58 | 11               | 81.64  | 68.51       | 89.69 | 81.64  | 68.51       | 89.69 |                  |
| <b>Age</b>                      |    |                  |        |             |       |        |             |       |                  |
| <3 years                        | 12 | 6                | 46.88  | 17.62       | 71.85 | 46.88  | 17.62       | 71.85 | 0.0003           |
| ≥ 3 years                       | 46 | 5                | 90.76  | 77.18       | 96.44 | 90.76  | 77.18       | 96.44 |                  |
| <b>Resection</b>                |    |                  |        |             |       |        |             |       |                  |
| GTR                             | 37 | 4                | 91.47  | 75.77       | 97.17 | 91.47  | 75.77       | 97.17 | 0.01             |
| Non-GTR                         | 21 | 7                | 64.34  | 39.24       | 81.23 | 64.34  | 39.24       | 96.44 |                  |
| <b>Metastases</b>               |    |                  |        |             |       |        |             |       |                  |
| No                              | 41 | 3                | 94.87  | 81.02       | 98.69 | 94.87  | 81.02       | 98.69 | <0.0001          |
| Yes                             | 17 | 8                | 44.14  | 17.67       | 67.98 | 44.14  | 17.67       | 67.98 |                  |
| <b>Histology</b>                |    |                  |        |             |       |        |             |       |                  |
| Classic                         | 36 | 5                | 88.45  | 72.06       | 95.51 | 88.45  | 72.06       | 95.51 | 0.008            |
| Anaplastic                      | 15 | 2                | 85.56  | 53.27       | 96.21 | N/A    | N/A         | N/A   |                  |
| Desmoplastic                    | 7  | 4                | 34.29  | 4.81        | 68.55 | N/A    | N/A         | N/A   |                  |

**Table 1C. Overall Survival (OS)**

| OS                              | N  | Number of events | 3 year | 95% CI for  |       | 5 year | 95% CI for  |       | Log-rank p-value |
|---------------------------------|----|------------------|--------|-------------|-------|--------|-------------|-------|------------------|
|                                 |    |                  | Rate   | 3-year Rate |       | Rate   | 5-year Rate |       |                  |
| <b>Total number of patients</b> | 58 | 10               | 81.83  | 67.65       | 90.23 | 81.83  | 67.65       | 90.23 |                  |
| <b>Age</b>                      |    |                  |        |             |       |        |             |       |                  |
| <3 years                        | 12 | 5                | 54.55  | 22.85       | 77.96 | 54.55  | 22.85       | 77.96 | 0.004            |
| ≥ 3 years                       | 46 | 5                | 88.64  | 71.75       | 95.71 | 88.64  | 71.75       | 95.71 |                  |
| <b>Resection</b>                |    |                  |        |             |       |        |             |       |                  |
| GTR                             | 37 | 4                | 89.97  | 71.34       | 96.75 | 89.97  | 71.34       | 96.75 | 0.03             |
| Non-GTR                         | 21 | 6                | 68.42  | 42.63       | 84.46 | 68.42  | 42.63       | 84.46 |                  |
| <b>Metastases</b>               |    |                  |        |             |       |        |             |       |                  |
| No                              | 41 | 3                | 94.48  | 79.61       | 98.60 | 94.48  | 79.61       | 98.60 | <0.0001          |
| Yes                             | 17 | 7                | 47.53  | 19.44       | 71.34 | 47.53  | 17.67       | 71.34 |                  |
| <b>Histology</b>                |    |                  |        |             |       |        |             |       |                  |
| Classic                         | 36 | 5                | 87.35  | 69.30       | 95.13 | 87.35  | 69.3        | 95.13 | 0.07             |
| Anaplastic                      | 15 | 2                | 84.62  | 51.22       | 96.21 | N/A    | N/A         | N/A   |                  |
| Desmoplastic                    | 7  | 4                | 50.00  | 11.09       | 68.55 | N/A    | N/A         | N/A   |                  |
