# Supplementary material
Source: PubMed Central journal article supplement (PMC3763747)

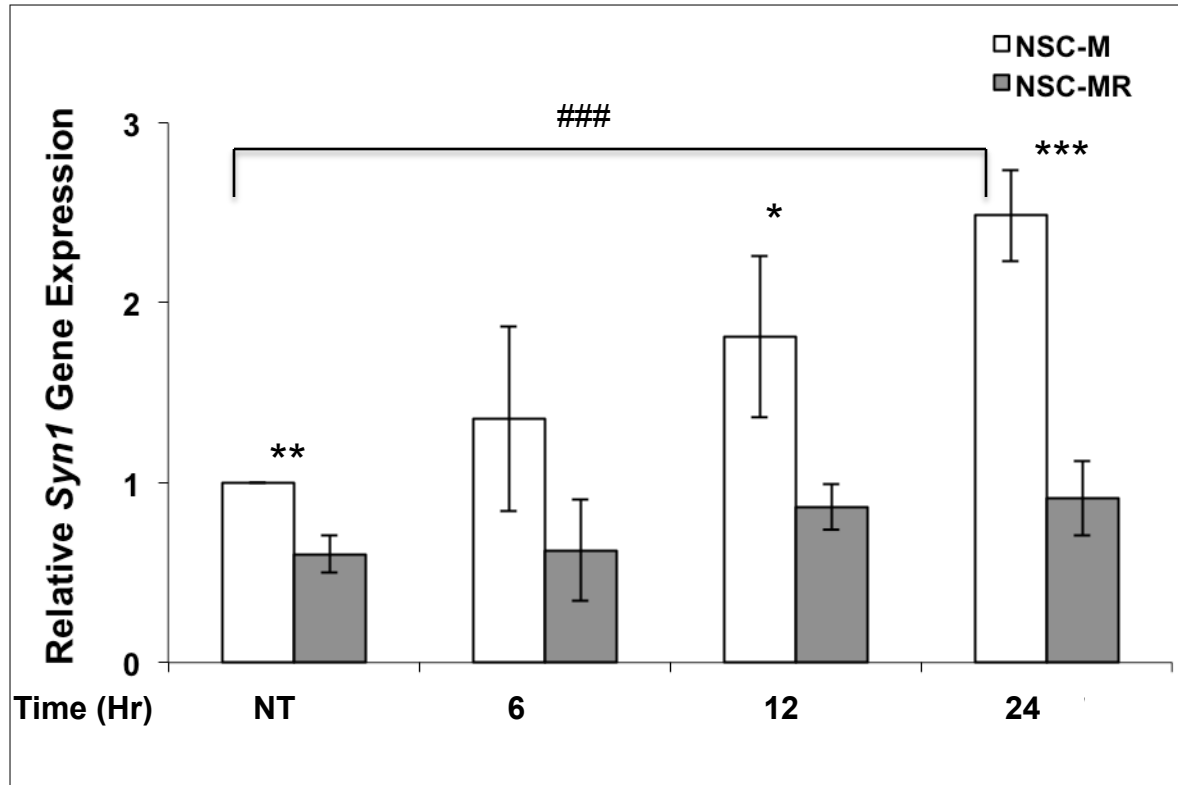

Supplement: NIHMS509482-supplement-Taylor_et_al_supplemental_data.pdf [file NIHMS509482-supplement-Taylor_et_al_supplemental_data.pdf]
